## Correction

# Correction: Exploration of the Dynamic Properties of Protein Complexes Predicted from Spatially Constrained Protein-Protein Interaction Networks

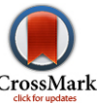

The *PLOS Computational Biology* Staff

In the Funding Statement, the author supported by a fellowship from an NSERC training program in Cellular Dynamics of Macromolecular Complexes should be EAY, instead of AT.

## Reference

1. Yen EA, Tsay A, Waldspuhl J, Vogel J (2014) Exploration of the Dynamic Properties of Protein Complexes Predicted from Spatially Constrained Protein-Protein Interaction Networks. *PLoS Comput Biol* 10(5): e1003654. doi:10.1371/journal.pcbi.1003654

---

**Citation:** The *PLOS Computational Biology* Staff (2014) Correction: Exploration of the Dynamic Properties of Protein Complexes Predicted from Spatially Constrained Protein-Protein Interaction Networks. *PLoS Comput Biol* 10(8): e1003816. doi:10.1371/journal.pcbi.1003816

**Published:** August 11, 2014

**Copyright:** © 2014 The *PLOS Computational Biology* Staff. This is an open-access article distributed under the terms of the Creative Commons Attribution License, which permits unrestricted use, distribution, and reproduction in any medium, provided the original author and source are credited.
